# Supplementary material for: Mycobacterial Metabolic Syndrome: LprG and Rv1410 Regulate Triacylglyceride Levels, Growth Rate and Virulence in Mycobacterium tuberculosis
Source: PubMed Central journal article supplement (PMC4709180; doi:10.1371/journal.ppat.1005351), 2016-01-11
Supplement: ppat.1005351.s003.pdf [file ppat.1005351.s003.pdf]

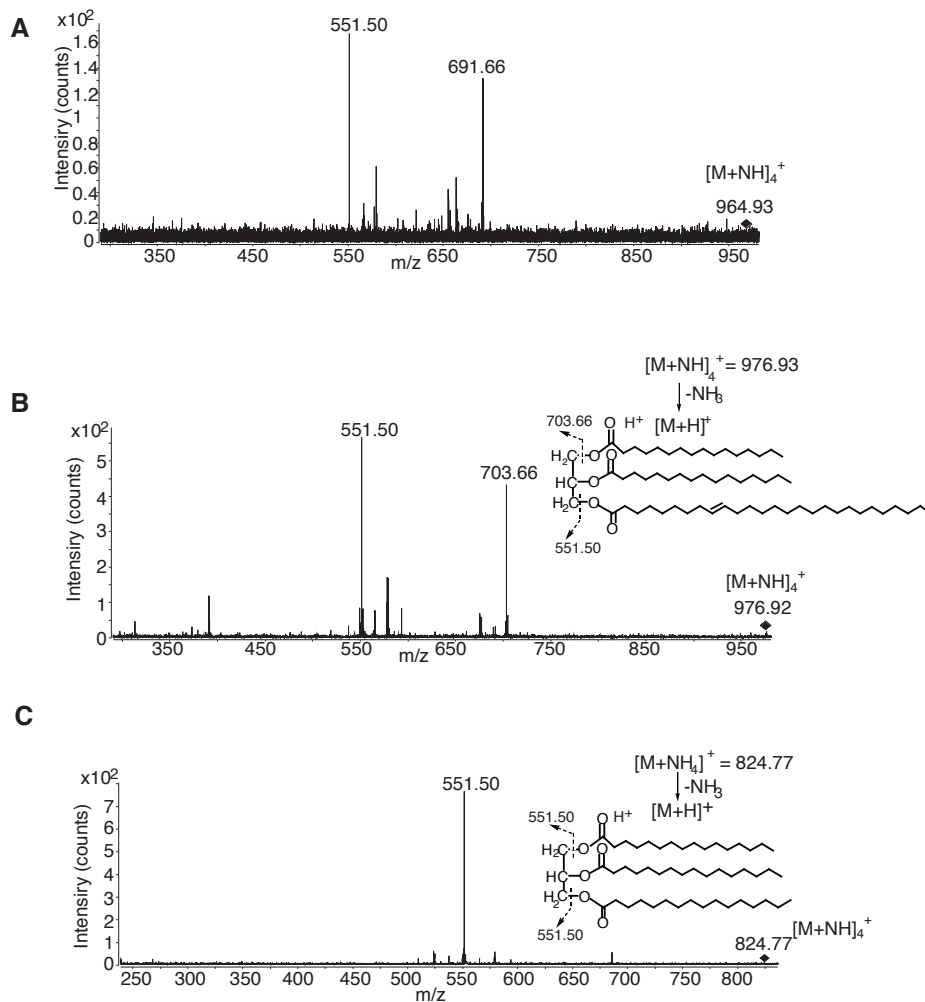

**Figure S2, related to Figure 1. Confirmation of TAG identity by collision induced dissociation (CID) mass spectrometry.** Lipid extract from Mut2 was prepared for collisional MS as described in Materials and Methods. (A) CID for  $m/z$  964.93 (TAG 58:0) in Figure 1C. (B) CID for  $m/z$  824.77 (TAG 48:0) and deduced fragmentation showing observed diacylglyceride units ( $m/z$  703.66 and  $m/z$  551.50). (C) CID for  $m/z$  976.72 (TAG 59:1) and deduced fragmentation showing observed diacylglyceride units ( $m/z$  551.50).
