# Supplementary material for: Mycobacterial Metabolic Syndrome: LprG and Rv1410 Regulate Triacylglyceride Levels, Growth Rate and Virulence in Mycobacterium tuberculosis
Source: PubMed Central journal article supplement (PMC4709180; doi:10.1371/journal.ppat.1005351), 2016-01-11
Supplement: ppat.1005351.s004.pdf [file ppat.1005351.s004.pdf]

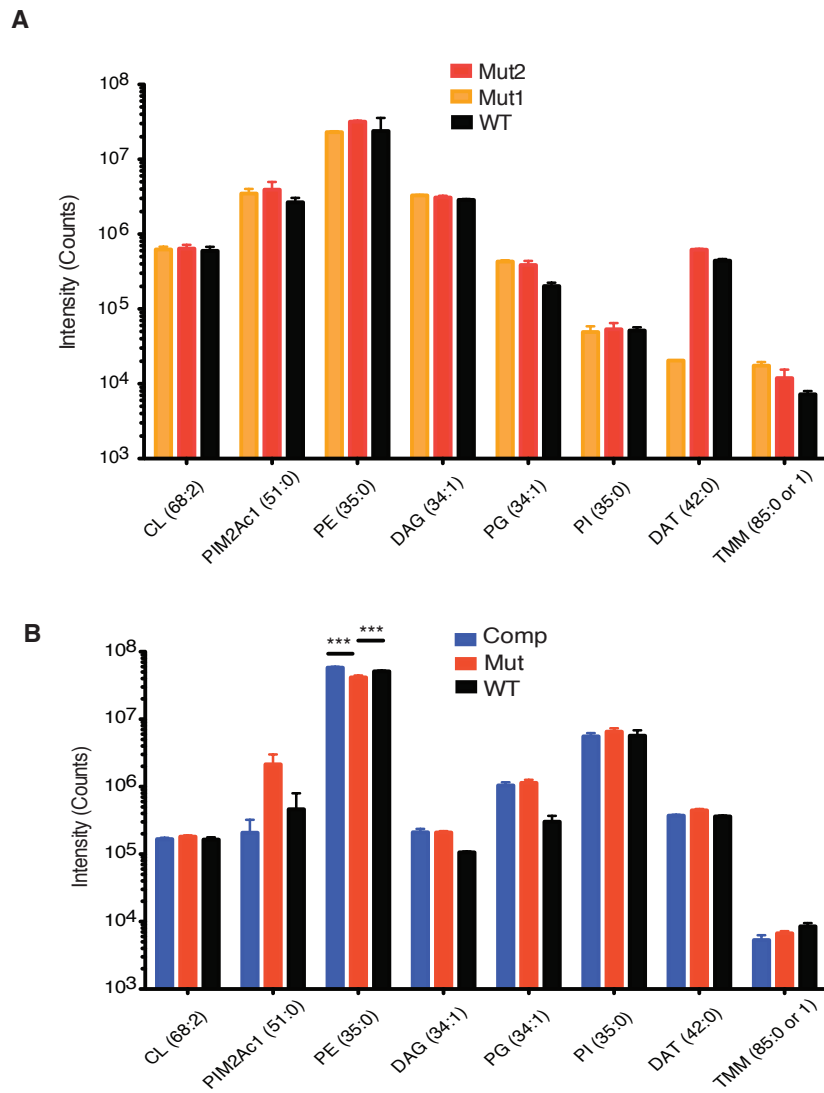

**Figure S3, related to Figure 1. Levels of selected lipids in the mycobacterial lipidome across strains as detected by HPLC/MS.** Lipid extract from the indicated strains (Fig 1A) was purified and analyzed as described in the Materials and Methods and S1 Methods. (A) Relative intensity of non-TAG lipids detected in Mut1, Mut2, and WT mycobacteria. (B) Relative intensity of non-TAG lipids detected in Comp2, Mut2, and WT mycobacteria. Two-way ANOVA with Bonferroni post-test (Mut1, Mut2 vs. WT) and (Comp2, WT vs. Mut2), \*  $p < 0.05$ , \*\*  $p < 0.01$ , \*\*\*  $p < 0.001$ . Cardiolipin, CL ( $m/z$  1423.04); monoacylated phosphatidyl-*myo*-inositol dimannoside, PIM<sub>1</sub>Ac<sub>2</sub> ( $m/z$  1451.91); phosphatidylethanolamine, PE ( $m/z$  734.57); diacylglycerol, DAG ( $m/z$  612.55); phosphatidylglycerol, PG ( $m/z$  766.55); phosphatidylinositol, PI ( $m/z$  870.60); diacyltrehalose, DAT ( $m/z$  976.76); trehalose monomycolate, TMM ( $m/z$  1595.43).
