# Supplementary material for: Mycobacterial Metabolic Syndrome: LprG and Rv1410 Regulate Triacylglyceride Levels, Growth Rate and Virulence in Mycobacterium tuberculosis
Source: PubMed Central journal article supplement (PMC4709180; doi:10.1371/journal.ppat.1005351), 2016-01-11
Supplement: ppat.1005351.s005.pdf [file ppat.1005351.s005.pdf]

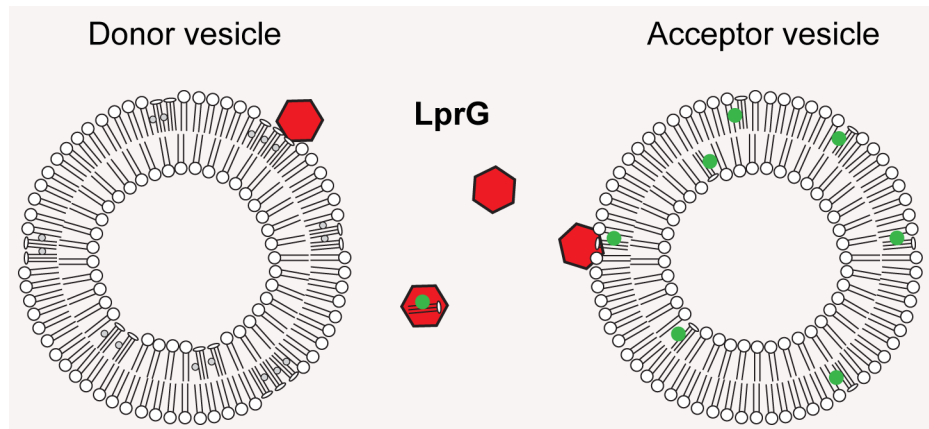

**Figure S4, related to Figure 2. A schematic for the vesicle-based assay used to measure TAG transfer activity.** Donor vesicles contain a concentration of NBD fluorophore-labeled TAG that results in partial self-quenching of the NBD fluorescence. In the presence of excess acceptor vesicles, which lack NBD-TAG, LprG extracts and binds NBD-TAG from acceptor vesicles and deposits it into donor vesicles. This activity is observed as an increase in fluorescence.
