# Supplementary material for: Mycobacterial Metabolic Syndrome: LprG and Rv1410 Regulate Triacylglyceride Levels, Growth Rate and Virulence in Mycobacterium tuberculosis
Source: PubMed Central journal article supplement (PMC4709180; doi:10.1371/journal.ppat.1005351), 2016-01-11
Supplement: ppat.1005351.s006.pdf [file ppat.1005351.s006.pdf]

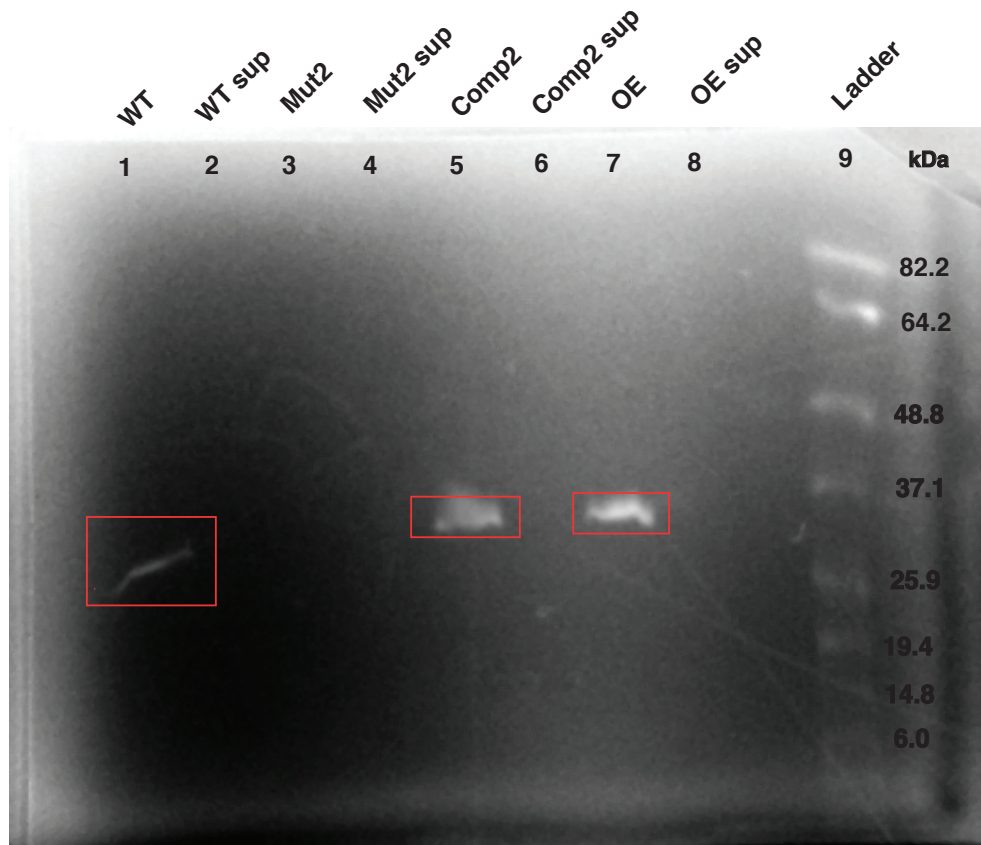

**Figure S5 (related to Figure 3). Western Blot for native LprG shows overexpression of the LprG-Rv1410 operon.** Mtb lysates were prepared from late logarithmic phase cells in standard 7H9 media (OADC, 0.2% glycerol, 0.05% Tween 80) then baked at 80°C for 2 hours in SDS—Laemmli buffer. Culture medium was filtered twice (0.2 micron, Millipore). Protein concentration was determined for cell lysates using a non-interfering (NI) protein assay (Biosciences). Lane 1: H37Rv (WT, 12 µg/µL); Lane 2: WT culture medium; Lane 3:  $\Delta lprG-rv1410c$  (Mut2, 12 µg/µL); Lane 4: Mut2 culture medium; Lane 5:  $\Delta lprG-rv1410c$  L5::*lprG-rv1410c* (Comp2, 12.5 µg/µL); Lane 6: Comp2 culture medium; Lane 7: WT L5::*lprG-rv1410c* (OE, 10.6 µg/µL). Lane 8: OE culture medium. Equal loading by volume for all lanes. Primary mouse monoclonal anti-LprG 1:100 (US Biologics); secondary goat anti-mouse HRP 1:10,000.
