# Supplementary material for: Mycobacterial Metabolic Syndrome: LprG and Rv1410 Regulate Triacylglyceride Levels, Growth Rate and Virulence in Mycobacterium tuberculosis
Source: PubMed Central journal article supplement (PMC4709180; doi:10.1371/journal.ppat.1005351), 2016-01-11
Supplement: ppat.1005351.s008.pdf [file ppat.1005351.s008.pdf]

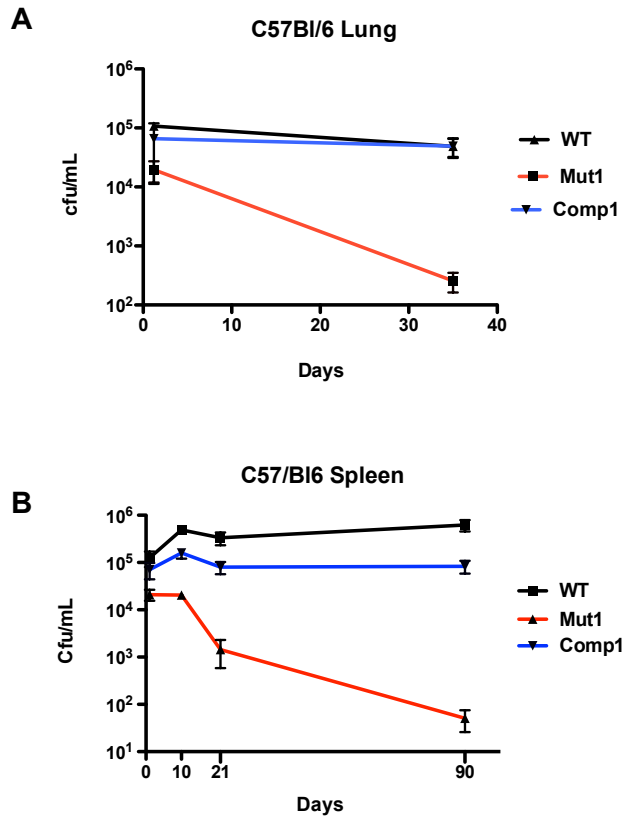

**Figure S7 (related to Figure 4). Complementation of *LprG-Rv1410* operon restores virulence in C57/Bl6 mice.** A) Composite graph of cfu recovered from the lungs of mice in two competition experiments: Mut1:WT (3:1) and Comp1:WT (3:1), as performed in Materials and Methods. B) Cfu recovered from the spleens of mice (five per group) receiving single strain IV tail vein infections with  $1 \times 10^6$  cfu of WT, Mut1, or Comp1. Cfu=colony-forming units. Mut1=mutant 1, WT=wild-type (Figure 1A), Comp1=*rv1410c::Tn + pMV762 lprG-rv1410c*.
