# Supplementary material for: Mycobacterial Metabolic Syndrome: LprG and Rv1410 Regulate Triacylglyceride Levels, Growth Rate and Virulence in Mycobacterium tuberculosis
Source: PubMed Central journal article supplement (PMC4709180; doi:10.1371/journal.ppat.1005351), 2016-01-11
Supplement: ppat.1005351.s010.pdf [file ppat.1005351.s010.pdf]

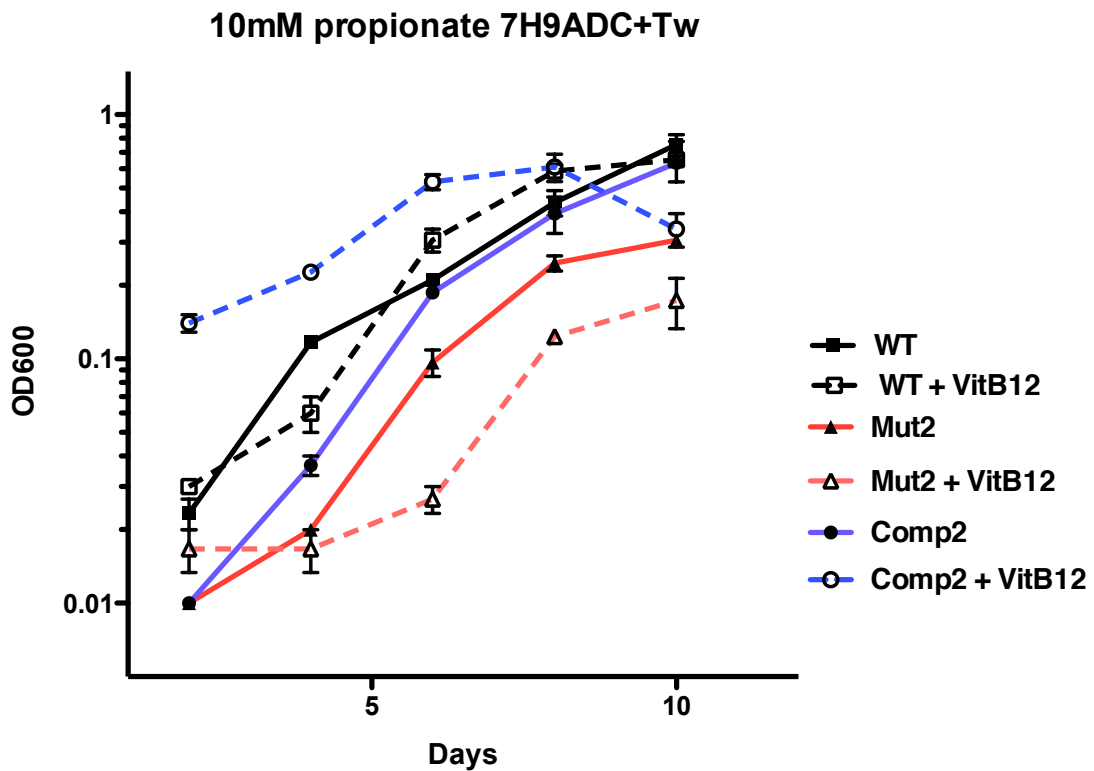

**Figure S9 (related to Figure 6). Vitamin B12 supplementation does not rescue growth defect of *LprG-Rv1410* mutant in propionate.** The indicated strains were cultured in 10 mM propionate as described in the materials and methods with or without the addition of +/- 0.5 µg/mL vitamin B12 (VitB12; dashed lines) at 37°C with shaking. Growth measured by OD 600, mean +/- standard deviation.
