# Supplementary material for: Mycobacterial Metabolic Syndrome: LprG and Rv1410 Regulate Triacylglyceride Levels, Growth Rate and Virulence in Mycobacterium tuberculosis
Source: PubMed Central journal article supplement (PMC4709180; doi:10.1371/journal.ppat.1005351), 2016-01-11
Supplement: ppat.1005351.s011.pdf [file ppat.1005351.s011.pdf]

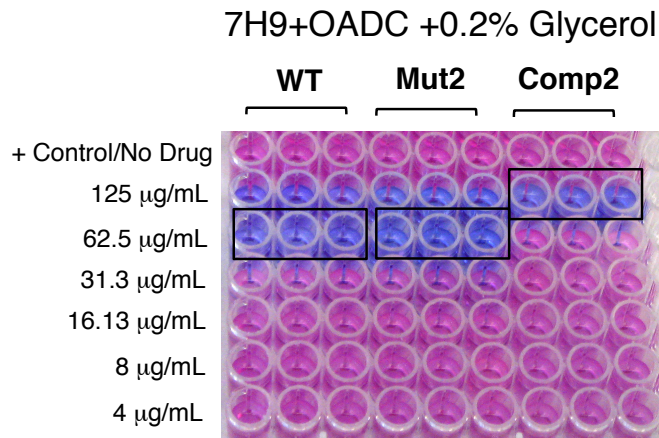

**Figure S10 (related to Figure 6). Addition of glycerol decreases susceptibility of the LprG-Rv1410 mutant to tetrahydrolipostatin.** MIC was performed as described in the Supplementary Materials and Methods. The MIC for WT, Mut2, and Comp2 was 62.5-125µg/mL in 7H9+ OADC (Sigma).
