# Supplementary material for: Mycobacterial Metabolic Syndrome: LprG and Rv1410 Regulate Triacylglyceride Levels, Growth Rate and Virulence in Mycobacterium tuberculosis
Source: PubMed Central journal article supplement (PMC4709180; doi:10.1371/journal.ppat.1005351), 2016-01-11
Supplement: ppat.1005351.s012.pdf [file ppat.1005351.s012.pdf]

**Table S1 (related to Figure 4,5). Mouse strains used for competition and survival experiments.**

| <b>Name</b>                 | <b>Defect</b>                                                       | <b>Strain</b>                              | <b>Source</b> |
|-----------------------------|---------------------------------------------------------------------|--------------------------------------------|---------------|
| BI6                         | None (wild type)                                                    | C57Bl/6J                                   | Jackson       |
| <i>nos2</i> <sup>-/-</sup>  | Inducible nitric oxide synthase                                     | B6.129P2- <i>Nos2</i> <sup>tm1Lau</sup> /J | Jackson       |
| <i>phox</i> <sup>-/-</sup>  | NADPH oxidase                                                       | B6.129S6- <i>Cybb</i> <sup>tm1Din</sup> /J | Jackson       |
| <i>inf-γ</i> <sup>-/-</sup> | IFN $\gamma$                                                        | B6.129S7- <i>Infγ</i> <sup>tm1Ts</sup> /J  | Jackson       |
| <i>rag1</i> <sup>-/-</sup>  | VDJ recombination; no mature B and T lymphocytes                    | B6.129S7- <i>Rag1</i> <sup>tm1Mom</sup> /J | Jackson       |
| SCID                        | Severe combined immunodeficiency; no functional B and T lymphocytes | B6.CB17- <i>Prkdc</i> <sup>scid</sup> /SzJ | Jackson       |
