# Supplementary material for: Mycobacterial Metabolic Syndrome: LprG and Rv1410 Regulate Triacylglyceride Levels, Growth Rate and Virulence in Mycobacterium tuberculosis
Source: PubMed Central journal article supplement (PMC4709180; doi:10.1371/journal.ppat.1005351), 2016-01-11
Supplement: ppat.1005351.s013.pdf [file ppat.1005351.s013.pdf]

**Table S2 (related to Figure 6): Effect of Carbon source restriction of growth rate of *Mtb in vitro*.**

| Carbon Source                                           | Average Generation Time (hours) |                  |                 | p-value<br>Mut2 v WT;<br>Mut2 v<br>Comp2 |
|---------------------------------------------------------|---------------------------------|------------------|-----------------|------------------------------------------|
|                                                         | WT (+/- SD)                     | Mut2 (+/- SD)    | Comp2 (+/- SD)  |                                          |
| 0.01% Cholesterol (Sauton's)                            | 20.63 +/- 1.27                  | 56.93 +/- 7.44   | 24.18 +/- 2.58  | <b>0.006;</b><br><b>0.002</b>            |
| 0.2% Glycerol (7H9)                                     | 17.08 +/- 0.99                  | 13.40 +/- 0.06   | 14.80 +/- 0.84  | 0.373; 0.067                             |
| 10mM Propionate (Sauton's)                              | 170.95 +/- 3.77                 | 390.73 +/- 85.69 | 124.48 +/- 4.77 | <b>0.008;</b><br><b>0.003</b>            |
| 10mM Propionate (7H9)                                   | 89.86 +/- 6.09                  | 148.29 +/- 25.94 | 66.42 +/- 4.06  | <b>0.004;</b><br><b>0.004</b>            |
| 0.2% Glycerol, 10mM Propionate (7H9)                    | 30.48 +/- 1.00                  | 27.69 +/- 0.12   | 31.02 +/- 1.04  | 0.062; <b>0.035</b>                      |
| 10mM Propionate, 5 mM Acetate (Sauton's)                | 43.96 +/- 1.56                  | 51.74 +/- 3.51   | 39.57 +/- 1.27  | <b>0.025, 0.003</b>                      |
| 10mM Propionate, 5mM Acetate (7H9)                      | 40.85 +/- 0.93                  | 35.72 +/- 1.09   | 26.19 +/- 0.91  | <b>0.007;</b><br><b>0.009</b>            |
| 0.2% Glycerol, 10mM Propionate, 5mM Acetate (7H9)       | 28.41 +/- 0.61                  | 27.45 +/- 0.97   | 29.13 +/- 0.59  | 0.336; 0.183                             |
| Oleic acid, 0.2% Glycerol, 10mM Propionate, 5mM Acetate | 25.11 +/- 0.4                   | 25.16 +/- 0.77   | 25.78 +/- 0.65  | 0.884; 0.528                             |

Growth rate was defined as doubling time as estimated from the average slope of the log-linear portion of the growth curve as follows: an exponential line was fitted to the average LOG<sub>2</sub>(OD<sub>600</sub>) values of the log-linear curves in triplicate. The average slope was derived from the triplicate lines by the equation,  $y=mx+b$  of the fitted line, with slope= $m$ , and doubling time in hours as  $1/m*24$ . Student's two-tailed t-tests for slope of Mut2 versus WT and Mut2 versus Comp2 are reported.
